# Supplementary material for: Comparison of olive leaf, olive oil, palm oil, and omega-3 oil in acute kidney injury induced by sepsis in rats
Source: PeerJ. 2019 Jul 9;7:e7219. doi: 10.7717/peerj.7219 (PMC6625600; doi:10.7717/peerj.7219)
Supplement: Supplemental Information 5 [file peerj-07-7219-s005.xlsx]

## Sheet: Pressure
Blood	Control 0	Control 24 h	Control 48 h	LPS 0	LPS 24 h	LPS 48 h	LPSEx 0	LPSEx 24 h	LPSEx 48 h	LPSExOlv 0	LPSExOlv 24 h	LPSExOlv 48 h	LPSOlv 0	LPSOlv 24 h	LPSOlv 48 h	LPSOmg 0	LPSOmg 24 h	LPSOmg 48 h	LPSPal 0	LPSPal 24 h	LPSPal 48 h
	134	134	134	126	112	91	120	101	109	115	103	102	128	112	105	128	110	103	129	95	101
	118	130	124	123	115	113	129	112	110	118	109	104	125	106	104	125	110	98	126	108	92
	133	125	119	134	111	88	127	102	105	133	105	109	133	108	92	127	122	110	136	103	105
	139	139	125	124	98	97	125	103	102	139	112	110	130	112	103	137	120	104	135	96	95
	129	122	135	123	95	93	123	105	93	137	100	105	128	110	102	135	107	98	127	103	102
	134	123	123	122	94	86	126	116	113	122	93	95	122	97	108	126	105	96	128	110	98

## Sheet: CLEARANCE
Clearance	CTL 0	CTL 48	LPS 0	LPS 48 h	LPSEx 0	LPSEx 48 h	LPSExOlv 0	LPSExOlv 48 h	LPSOlv 0	LPSOlv 48 h	LPSOmg 0	LPSOmg 48 h	LPSPal 0	LPSPal 48 h
	1.21	1.31	0.9	0.97	1.33	0.59	1.17	0.85	1.26	0.55	1.02	0.84	0.97	0.71
	1.07	1.18	1.07	0.34	1.05	0.81	1.81	0.81	1.18	1.04	1.31	0.6	1.46	0.73
	1.46	1.35	1.06	0.82	1.45	0.82	1.05	0.76	1.26	0.57	1.37	0.83	0.91	0.86
	1.03	1.04	1.4	0.71	1.02	0.83	0.98	0.59	1.02	1.33	1.12	0.82	0.91	0.82
	1.12	1.34	0.72	0.57	1.21	0.97	0.91	0.91	1.25	0.69	1.58	0.79	1.72	0.79
	1.29	1.55	0.84	0.63	1.44	0.56	1.15	0.75	1.23	1.02	1.28	0.78	0.89	0.78

## Sheet: TBARS
TBARS	Control 0	Control 24 h	Control 48 h	LPS 0	LPS 24 h	LPS 48 h	LPSEx 0	LPSEx 24 h	LPSEx 48 h	LPSExOlv 0	LPSExOlv 24 h	LPSExOlv 48 h	LPSOlv 0	LPSOlv 24 h	LPSOlv 48 h	LPSOmg 0	LPSOmg 24 h	LPSOmg 48 h	LPSPal 0	LPSPal 24 h	LPSPal 48 h
	10.6	8.3	8.2	8.6	191	313	8.5	163	154	7.9	53.5	127	8.8	77.2	61.5	12.2	57.8	64.5	6.8	137.9	164.3
	8.5	7.7	10.6	8.5	270	232	8.9	126.4	118.9	12.3	92.4	81.1	12.3	79.2	110	11.4	44.1	72	9.6	118.9	108.9
	9.2	7.1	8.3	13.2	220	286	1.3	135.5	173.3	8.8	82.3	100.7	9.5	47.9	119	10.9	39.4	55.6	6.5	95.5	128.8
	7.3	10.1	6.4	4.3	247	290	11.6	130.4	195.7	7.3	63.4	78	7.7	74	66.3	7.9	58.2	44.5	6.7	64.6	92.1
	11.5	6	6.9	11.9	227	195	5.4	107.4	179.4	12.5	88.1	72.3	9.6	110	57	10.7	67.6	42.3	11.2	96.3	125.5
	8.1	7.3	9.7	7.9	256	291	8.1	142.8	168.2	9.3	104.5	61.6	11.5	70.4	80	8.6	52.2	72.3	7.1	102.3	160.3

## Sheet: TNF
TNF-α	Control 0	Control 24 h	Control 48 h	LPS 0	LPS 24 h	LPS 48 h	LPSEx 0	LPSEx 24 h	LPSEx 48 h	LPSExOlv 0	LPSExOlv 24 h	LPSExOlv 48 h	LPSOlv 0	LPSOlv 24 h	LPSOlv 48 h	LPSOmg 0	LPSOmg 24 h	LPSOmg 48 h	LPSPal 0	LPSPal 24 h	LPSPal 48 h
	1.24	1.14	1.26	1.48	6.05	1.15	1.35	3.91	0.99	1.01	1.91	2.58	0.99	2.89	0.83	1.05	2.7	2.3	1.41	2.21	1.68
	1.47	1.32	1.15	1.44	4.9	1.24	1.1	2.04	1.16	1.26	3.75	1.16	1.24	2.89	1.56	1.53	2.55	1.91	1.72	3.1	2.44
	1.24	1.58	1.06	1.22	3.91	1.55	1.6	3.7	2.04	1.7	3.53	1.56	1.73	3.21	1.16	1.2	2.38	1.16	1.22	2.89	2.3
		2.24	1.26		4.7	2.03		3.9	1.35		1.89	2.3		2.77	1.83		2.12	1.56		2.55	1.79
		1.35	2.44		6.03	1.55		3.37	0.68		2.77	1.35		2.13	1.16		3.97	2.04		3.97	2.04
		1.08	1.04		3.91	1.34		3.91	1.16		2.73	2.58		2.99	1.21		2.21	1.37		2.51	1.02

## Sheet: IL-6
IL-6	Control 0	Control 17 h	Control 48 h	LPS 0	LPS 24 h	LPS 48 h	LPSEx 0	LPSEx 24 h	LPSEx 48 h	LPSExOlv 0	LPSExOlv 24 h	LPSExOlv 48 h	LPSOlv 0	LPSOlv 24 h	LPSOlv 48 h	LPSOmg 0	LPSOmg 24 h	LPSOmg 48 h	LPSPal 0	LPSPal 24 h	LPSPal 48 h
	7.19	6.85	6.63	6.85	255	147	8.65	272	21.35	8.76	172	14.8	8.96	79	12.13	7.54	114	20.25	7.89	186	23.2
	9.86	7.97	12.62	9.84	203	79	12.19	149	30.43	11.68	82	16.39	11.04	74	18.18	9.52	48	15.23	8.85	240	13.35
	9.02	6.19	9.49	10.9	210	64	9.49	147	33.51	9.61	124	10.2	9.98	122	14.54	9.02	33	17.2	10.6	187	15.96
					378	61		193	30.43		93	14.56		138	8.45		59	14.93		90	13.55
					289	131		253	20.25		78	7.44		54	13.54		134	7.4		274	16.8
					198	88		198	30.43		182	44.18		88.97	5.55		70	10.22		188	20.2

## Sheet: IL-10
IL-10	Control 0	Control 17 h	Control 48 h	LPS 0	LPS 24 h	LPS 48 h	LPSEx 0	LPSEx 24 h	LPSEx 48 h	LPSExOlv 0	LPSExOlv 24 h	LPSExOlv 48 h	LPSOlv 0	LPSOlv 24 h	LPSOlv 48 h	LPSOmg 0	LPSOmg 24 h	LPSOmg 48 h	LPSPal 0	LPSPal 24 h	LPSPal 48 h
	38.2	39	30	31	643	715	33	1640	1609	32	849	1924	30	1678	1623	30	1234	2089	33	1163	2158
	30	32	32	32	474	887	33	790	1946	32	1041	3051	32	1200	2316	33	1400	2118	31	877	1532
	32.5	24	36	36	427	697	38	1127	2275	30	1920	1963	40	1306	2004	38	1307	2511	30	1451	2789
	30.28				357	887		1784	1160		637	2019		891	1525		1287	1934		1093	1751
	31.18				495	592		1655	1137		952	2208		1157	2995		2115	1963		1178	1679
	35.4				454	757		1555.5	991		2089	858		1362	3102		1139	3446		2345	2119

## Sheet: IL-1a
IL1-α	Control 0	Control 17 h	Control 48 h	LPS 0	LPS 24 h	LPS 48 h	LPSEx 0	LPSEx 24 h	LPSEx 48 h	LPSExOlv 0	LPSExOlv 24 h	LPSExOlv 48 h	LPSOlv 0	LPSOlv 24 h	LPSOlv 48 h	LPSOmg 0	LPSOmg 24 h	LPSOmg 48 h	LPSPal 0	LPSPal 24 h	LPSPal 48 h
	2.15	1.49	1.68	2.03	14.2	13.07	1.9	3.99	63	2.22	8.19	24.04	2.06	8.89	7.53	1.95	3.36	6.33	2.26	4.39	24.04
	1.56	1.56	1.49	1.08	17.3	15.27	1.19	28.3	20	1.4	3.92	21.01	1.07	4.96	16.43	1.16	8.19	6.27	1.18	3.99	21.01
	2.19	2.42	2.01	1.9	24	16.3	1.96	18.29	23	1.9	2.15	43.49	1.98	4.61	24.85	1.9	3.27	16.43	1.98	14.2	8.89
	1.09				11.3	14.19		6.27	7.85		4.19	11.3		12.21	8.89		6.33	8.19		12.21	4.96
	1.19				12.21	24.4		18.29	29.22		5.29	16.43		5.29	11.3		3.44	7.85		16.43	16.43
	1.92				18.2	21		6	42.23		3.62	7.21		17.03	12.21		12.21	8.89		24.85	24.85

## Sheet: IL-1b
IL-1β	Control 0	Control 17 h	Control 48 h	LPS 0	LPS 24 h	LPS 48 h	LPSEx 0	LPSEx 24 h	LPSEx 48 h	LPSExOlv 0	LPSExOlv 24 h	LPSExOlv 48 h	LPSOlv 0	LPSOlv 24 h	LPSOlv 48 h	LPSOmg 0	LPSOmg 24 h	LPSOmg 48 h	LPSPal 0	LPSPal 24 h	LPSPal 48 h
	39	38.8	42.2	31	671	560	35	501	484	28	261	286	28	74	168	29	147	72	25	450	470
	42	39	23.5	39	552	750	39	372	304	37	211	109	34	253	159	32	145	244	38	402	308
	37	35.3	30.2	29	504	488	36	478	430	32	216	98	35	168	69	27	150	127	25	255	208
	30				659	647		226	453		67	176		178	277		160	159		137	190
	39.9				597	640		301	551		199	170		156	252		80	133		139	301
	25.3				580	690		544	412		92	393		166	260		150	188		150	234

## Sheet: GM-CSF
GM-CSF	Control 0	Control 17 h	Control 48 h	LPS 0	LPS 24 h	LPS 48 h	LPSEx 0	LPSEx 24 h	LPSEx 48 h	LPSExOlv 0	LPSExOlv 24 h	LPSExOlv 48 h	LPSOlv 0	LPSOlv 24 h	LPSOlv 48 h	LPSOmg 0	LPSOmg 24 h	LPSOmg 48 h	LPSPal 0	LPSPal 24 h	LPSPal 48 h
	1.56	1.82	1.79	1.93	12	12.2	1.32	6.9	13.9	1.46	3.5	5.9	2.02	2.2	5.9	1.98	3.2	5.9	1.61	5.2	3.3
	1.59	1.29	1.23	1.22	10	11.4	1.59	11.4	9.3	1.59	9.3	4.2	1.37	2	10.7	1.27	2.2	6	1.39	4.7	7.1
	1.68	1.77	1.71	1.58	9.2	12.2	2.01	5.9	6.9	1.66	8	8	1.59	5	5	1.64	9	7.8	1.92	8.1	5.9
	1.56				12	10.7		3.5	9.9		6.9	5		7.4	9.9		6.1	5.9		11.2	3.3
	1.59				13	13.9		6.7	9.9		10.7	2.4		9.3	4.2		3.6	3.1		3.4	10.2
	1.68				11.4	13.9		3.2	5.9		5.4	8		12.2	11.4		3	2.9		4.1	3.2

## Sheet: PCNA
PCNA	Control 48 h	LPS 48 h	LPSEx 48 h	LPSExOlv 48 h	LPSOlv 48 h	LPSOmg 48 h	LPSPal 48 h
	0.203	0.022	1.943	1.198	1.198	1.623	1.807
	0.582	0.137	1.603	2.414	2.405	2.202	1.102
	0.414	0.142	1.549	1.142	2.66	1.259	2.09
	0.384	0.242	1.44	1.849	1.255	2.212	1.464
	0.333	0.322	1.414	2.393	1.066	1.568	1.162
	1.055	0.011	1.363	1.66	1.05	1.143	1.248
	0.637	0.067	1.007	1.259	1.002	2.861	2.225
	0.397	0.016	1.046	2.09	1.032	2.11	1.088
	0.535	0.019	1.482	1.809	1.282	1.124	1.149
	0.841	0.001	2.382	1.449	1.002	1.381	1.105
	0.449	0.872	2.186	1.872	2.966	1.329	2.257
	1.519	0.026	2.001	1.996	2.683	2.414	1.455
	2.154	1.578	1.12	2.034	1.019	2.005	1.328
	2.612	0.176	2.264	1.966	1.784	1.836	1.346
	2.101	0.032	2.344	2.329	1.789	2.182	2.422
	1.883	0.152	0.875	2.257	1.992	1.139	1.715
	2.576	0.831	1.148	1.996	2.313	1.667	2.129
	1.542	0.429	2.265	0.864	1.742	1.953	1.437
	1.3	0.716	2.002	1.021	1.149	2.188	2.295
	1.038	0.153	1.426	2.056	1.191	1.662	1.044
	0.369	0.076	1.5	2.481	2.009	1.046	1.625
	1.216	0.053	1.5	1.769	1.685	2.009	1.812
	1.185	0.073	1.005	1.009	1.069	1.008	0.772
	0.864	0.021	2.456	2.049	1.769	1.009	2.049
	0.47	0.013	2.4	2.056	1.574	2.008	2.142
	1.126	0.004	1.382	1.124	1.645	1.02	1.298
	1.254	0.011	0.313	1.574	1.602	2.009	1.285
	1.154	0.007	2.282	1.008	1.907	1.002	1.151
	1.186	0.008	1.267	2.142	2.812	1.008	1.086
	1.242	0.008	2.343	2.182	1.871	1.009	2.157

[truncated: 2 more sheets: Caspase,  Survival]
